# Supplementary material
Source: MDPI journal article supplement (https://www.mdpi.com/2073-4441/13/21/3121)
Supplement: s1 [file s1]

# Article

## Evaluation of Paired Watershed Runoff Relationships since Recovery from a Major Hurricane on a Coastal Forest—A Basis for Examining Effects of *Pinus palustris* Restoration on Water Yield

Devendra M. Amatya <sup>1,\*</sup>, Ssegane Herbert <sup>2</sup>, Carl C. Trettin <sup>3</sup> and Mohammad Daud Hamidi <sup>4</sup>

### Supplementary Materials

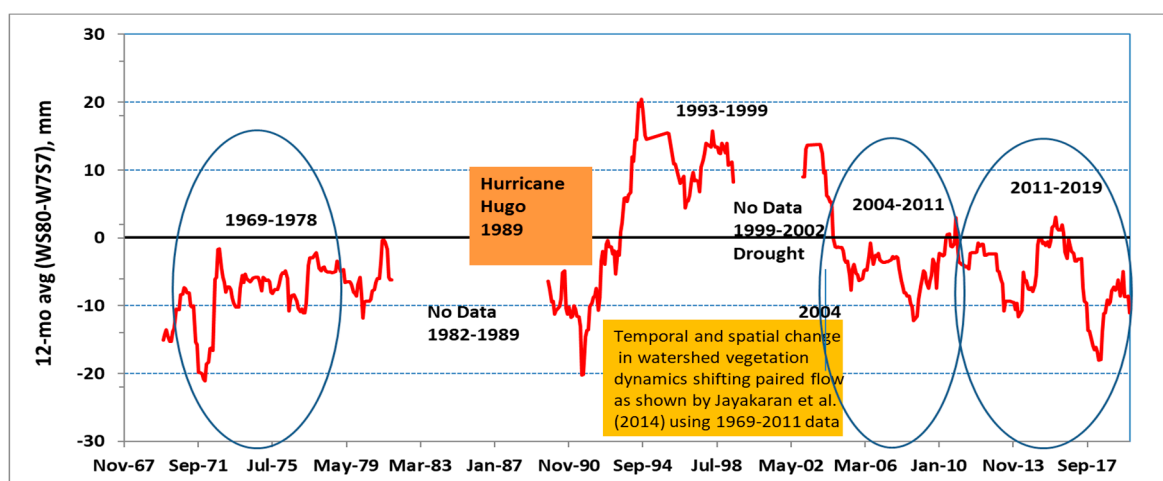

**Figure S1.** 12-month moving average of difference in monthly flow between WS80 and WS77 for 2011–2019 climatic conditions compared to those in 1969–78 and 2004–11 using whole long-term data with a large gap from 1982 to 1989.

**Table S1** Chronology of activities that took place on the WS77 and WS80 watersheds.

| Year           | Watersheds |      |                                              |
|----------------|------------|------|----------------------------------------------|
|                | WS80       | WS77 |                                              |
| 1963           |            | Y    | Weir installed                               |
| 1968           | Y          |      | Weir installed/Calibration starts            |
| 1976           | Y          | Y    | Water Quality Monitoring/Calibration ends    |
| 1977–1981      |            | Y    | Prescribed burn 20% of WS77 each year        |
| 1981           | Y          | Y    | Data collection discontinued                 |
| September 1989 | Y          | Y    | Hurricane damage, 80% of mature trees killed |
| 1990           |            | Y    | Salvage—Large dead stems removed             |
| 1993           |            | Y    | Regeneration on WS77 decreases flow          |
| 1999           |            | Y    | NDVI of WS77 = pre-hurricane                 |
| 2001           | Y          |      | Reduced watershed size 206 to 160 ha         |
| 2001           |            | Y    | Mastication/Understory vegetation mowed      |
| 2003           |            | Y    | Growing season prescribed burn in >80% area  |
| 2003           | Y          |      | Pine basal area = pre-hurricane level area   |

|      |   |   |                                  |
|------|---|---|----------------------------------|
| 2004 | Y | Y | Streamflow = pre-hurricane level |
| 2006 |   | Y | Biomass thinning of understory   |
| 2007 |   | Y | Whole tree thinning              |
| 2008 |   | Y | Prescribed burn                  |
| 2013 |   | Y | Prescribed Burn                  |
| 2016 |   | Y | Prescribed Burn                  |
| 2018 |   | Y | Prescribed Burn                  |

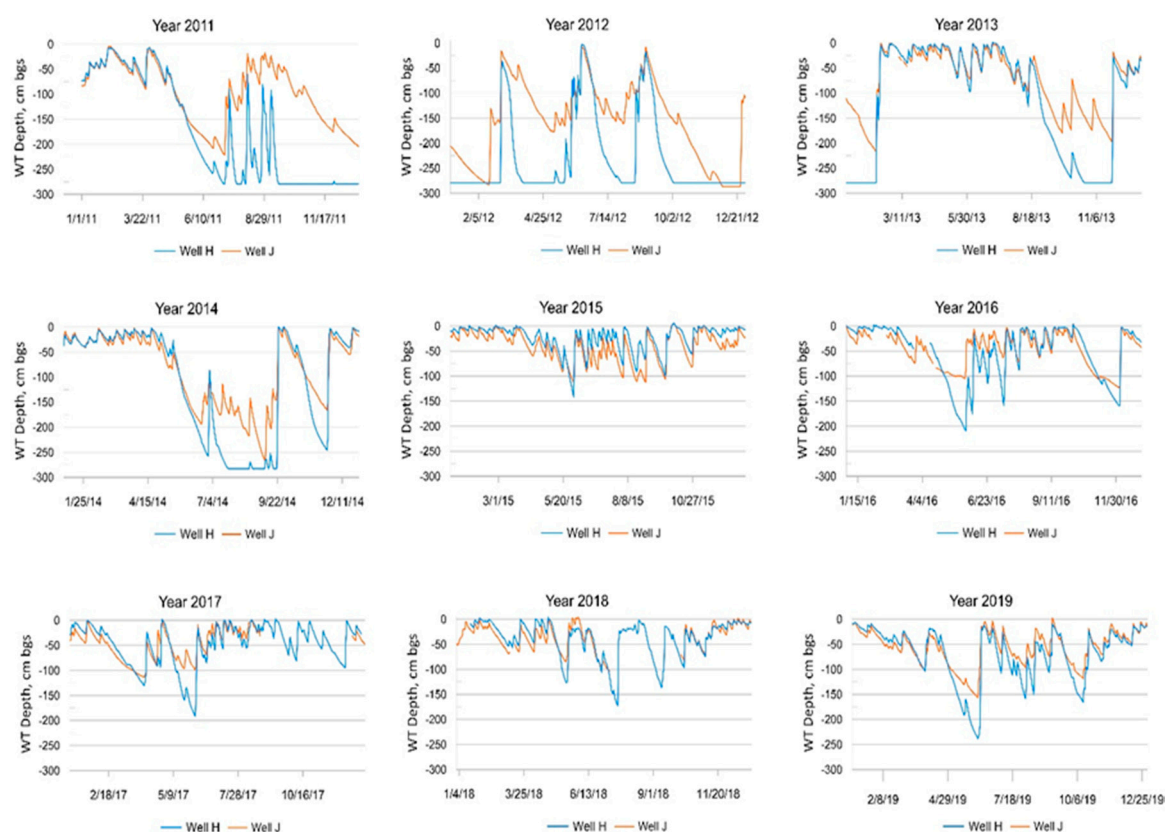

**Figure S2.** Measured daily water table depths on WS77 (Well J) and WS80 (Well H) watersheds for the years 2011 to 2019.

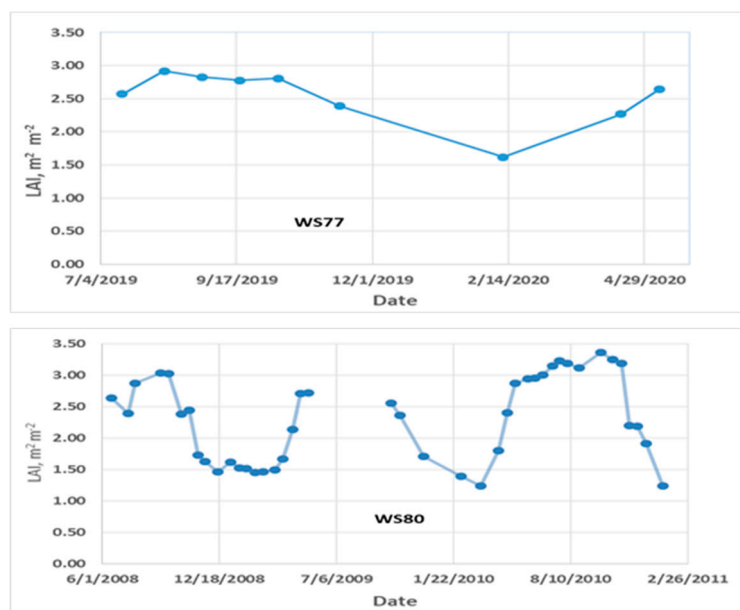

**Figure S3.** LiCOR-2000 measured watershed averaged LAI for WS77 (top) and WS80 (bottom) for the 2019-2020 and 2008-2011 periods, respectively

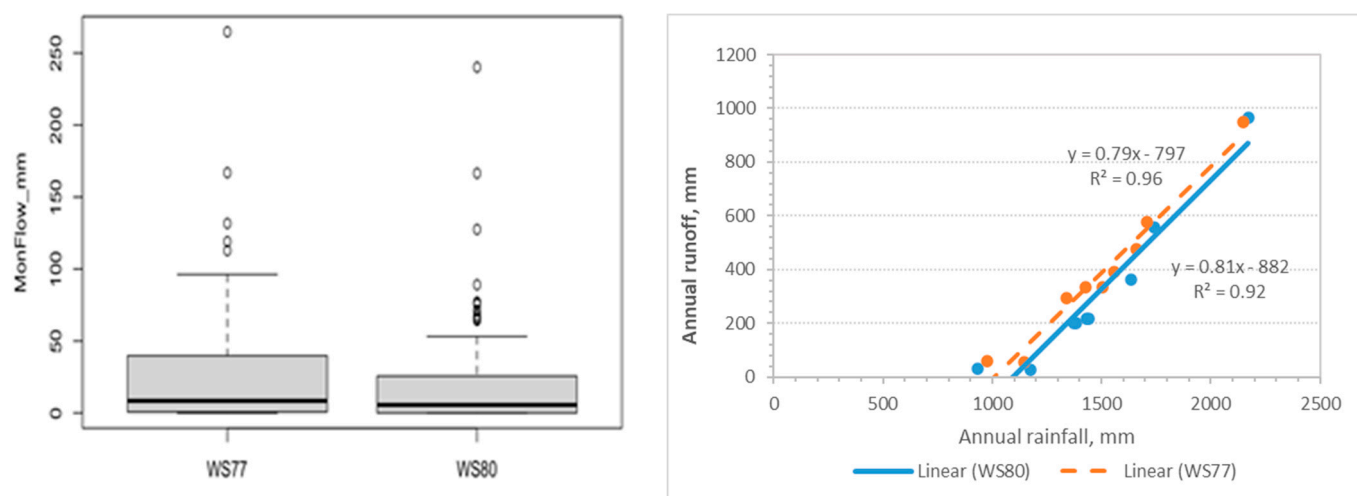

**Figure S4.** (a) Box plot with median and interquartile range of monthly flow (MonFlow) measured on WS77 and WS80 watersheds in 2011-2019 without October 2015 as an outlier, and (b) Annual rainfall versus annual runoff between paired watersheds for 2011-2019, showing larger storage on WS80 than on WS77.

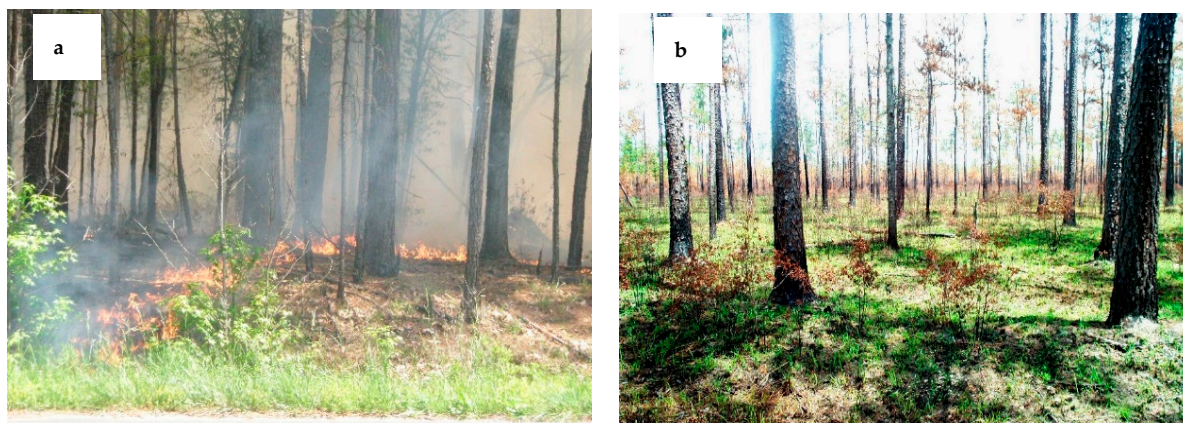

**Figure S5.** Pictures of (a) operational prescribed burning and (b) post-burn land cover on WS77 treatment watershed.
